# Supplementary material for: Anthropic Constraint Dynamics in European Western Mediterranean Floodplains Related to Floods Events
Source: MDPI journal article supplement (doi:10.3390/rs15194798), 2023-10-01
Supplement: s1 [file s1]

**Table S1.** Major flood events in the examined NUTS since 1850, along with the number of victims, if known.

| Year | Month     | Day(s)  | NUTS name (n. Casualties) | Source      |
|------|-----------|---------|---------------------------|-------------|
| 1850 |           |         | Barcelona                 | [101]       |
| 1853 |           |         | Genova, La Spezia         | [102]       |
| 1853 | May       | 20 – 26 | Barcelona                 | [101]       |
| 1855 | November  | 17      | Valencia                  | [103]       |
| 1856 | June      | 16      | Barcelona                 | [103]       |
| 1856 | October   | 28      | Cagliari (1)              | [104]       |
| 1858 | August    | 19      | Savona (50)               | [105]       |
| 1859 | August    |         | Savona                    | [106]       |
| 1860 |           |         | Valencia                  | [107]       |
| 1862 | September | 14 – 15 | Barcelona                 | [108]       |
| 1864 |           |         | Valencia                  | [107]       |
| 1864 | November  | 6       | Grosseto                  | [109]       |
| 1866 | October   | 20 – 25 | Barcelona                 | [101,103]   |
| 1867 | -         |         | Cagliari (1)              | [104]       |
| 1868 | -         |         | Cagliari                  | [104]       |
| 1869 | -         |         | Cagliari, Genova*         | [102*, 104] |
| 1869 | December  | 10      | Pisa (some)               | [107]       |
| 1870 | September | 30 – 1  | Valencia                  | [103]       |
| 1872 | October   | 17 – 18 | Savona                    | [106]       |
| 1874 |           |         | Barcelona                 | [101]       |
| 1874 | September | 22 – 23 | Barcelona                 | [103]       |
| 1875 | September | 9 – 17  | Barcelona                 | [103]       |
| 1878 | August    | 2 – 3   | Savona                    | [106]       |
| 1881 |           |         | Cagliari                  | [104]       |
| 1882 | October   | 27      | Imperia                   | [110]       |
| 1884 | September | 14 – 15 | Barcelona                 | [103]       |
| 1885 |           |         | La Spezia                 | [103]       |
| 1886 | November  | 11      | Savona                    | [106]       |
| 1889 | June      | 28      | Genova (1)                | [105]       |
| 1889 | October   | 5       | Cagliari (dozens)         | [111]       |
| 1891 | October   | 21      | Savona                    | [106]       |
| 1892 | October   | 8       | Genova                    | [105]       |
| 1892 |           | 21 – 22 | Cagliari (200)            | [104]       |
| 1892 | November  | 9       | Corse du Sud              | [94]        |
| 1893 | July      | 26      | Barcelona                 | [103]       |
| 1893 | November  | 28 – 29 | Cagliari (4)              | [104]       |
| 1896 | June      | 8       | Savona (1)                | [106]       |
| 1897 | November  | 1       | Valencia                  | [103]       |
| 1897 |           | 10      | Valencia                  | [103]       |
| 1898 |           |         | Cagliari (many)           | [111]       |
| 1898 | January   | 14 – 18 | Barcelona                 | [101,103]   |
| 1898 | April     | 17 – 18 | Savona                    | [106]       |
| 1900 | August    | 23      | Savona (1)                | [106]       |
| 1900 | September | 27      | Savona (some)             | [106]       |
| 1901 | September | 24      | Savona                    | [106]       |
| 1901 | October   | 21 – 23 | La Spezia                 | [110]       |
| 1903 | October   | 29 – 30 | Genova                    | [105]       |

|      |           |         |                    |            |
|------|-----------|---------|--------------------|------------|
| 1905 |           |         | Genova             | [102]      |
| 1906 | June      | 24      | Sassari            | [110]      |
| 1907 |           |         | Genova             | [102]      |
| 1907 | October   | 12 – 24 | Barcelona          | [101,103]  |
| 1907 |           | 30      | Imperia            | [110]      |
| 1907 | November  | 9       | Grosseto           | [110]      |
| 1908 | July      | 18      | Genova             | [102]      |
| 1908 | October   | 15      | Valencia           | [103]      |
| 1909 | January   | 16      | Sassari            | [110]      |
| 1910 | January   | 25      | Sassari            | [110]      |
| 1910 | December  | 9       | Imperia            | [110]      |
| 1912 | March     | 18      | Imperia            | [110]      |
| 1913 | January   | 12      | Pisa               | [107]      |
| 1913 | September | 29 – 30 | Barcelona          | [103]      |
| 1914 | March     | 26      | Imperia            | [110]      |
| 1914 | October   | 30      | Imperia            | [110]      |
| 1916 | November  | 4 – 5   | Savona             | [106]      |
| 1917 | February  | 7 – 17  | Barcelona          | [103]      |
| 1919 | January   | 8       | Imperia, Livorno   | [110]      |
| 1919 | November  | 2       | Livorno            | [110]      |
| 1920 | February  | 19 – 20 | Barcelona          | [103]      |
| 1920 | June      | 13      | Savona             | [106]      |
| 1920 | September | 27      | Sassari            | [110]      |
| 1920 | December  |         | Pisa               | [107]      |
| 1922 | December  | 21      | La Spezia          | [110]      |
| 1923 | October   |         | La Spezia          | [110]      |
| 1924 | April     | 9       | Livorno            | [110]      |
| 1926 | March     | 9       | Sassari            | [110]      |
| 1926 | August    | 31 – 4  | Barcelona          | [103]      |
| 1926 | November  |         | Imperia            | [110]      |
| 1926 |           | 2       | Genova, La Spezia* | [102,110*] |
| 1926 |           | 10      | La Spezia          | [110]      |
| 1926 |           | 24      | Alpes Marittimes   | [94]       |
| 1927 | October   | 22      | Sassari            | [110]      |
| 1927 | November  | 12      | Sassari            | [110]      |
| 1927 | December  | 6 – 8   | Sassari            | [110]      |
| 1928 | January   | 19      | Sassari            | [110]      |
| 1928 | March     | 27      | Sassari            | [110]      |
| 1928 | April     | 4       | Sassari            | [110]      |
| 1928 | October   | 27      | La Spezia          | [110]      |
| 1928 | November  | 1       | La Spezia          | [110]      |
| 1928 |           | 9       | Grosseto           | [110]      |
| 1929 | October   | 6 – 7   | Savona             | [106]      |
| 1929 |           | 7 – 8   | Cagliari (3)       | [104]      |
| 1929 |           | 20      | La Spezia          | [110]      |
| 1929 | November  | 8 – 10  | Cagliari, Sassari* | [104,110*] |
| 1929 |           | 17      | Sassari            | [110]      |
| 1930 | February  | 10 -14  | Cagliari           | [104]      |

|      |           |         |                            |            |
|------|-----------|---------|----------------------------|------------|
| 1930 | September | 28      | Livorno                    | [110]      |
| 1931 | January   | 27      | Sassari                    | [110]      |
| 1931 | February  | 22      | Sassari                    | [110]      |
| 1931 | October   | 17      | Sassari                    | [110]      |
| 1932 | September | 28 – 29 | Alpes Marittimes           | [94]       |
| 1932 | October   | 7       | Sassari                    | [110]      |
| 1932 | December  | 2       | Livorno                    | [110]      |
| 1933 | July      | 27      | Sassari                    | [110]      |
| 1933 | August    | 18      | Sassari                    | [110]      |
| 1933 | September | 25 – 26 | Savona                     | [106]      |
| 1933 | October   | 1       | Sassari                    | [110]      |
| 1933 | November  | 8       | Sassari                    | [110]      |
| 1934 | February  | 5       | Sassari                    | [110]      |
| 1934 | March     | 1       | La Spezia                  | [110]      |
| 1934 | September |         | Savona                     | [106]      |
| 1934 | November  | 16      | Savona                     | [106]      |
| 1934 | December  |         | Savona                     | [106]      |
| 1935 | October   | 12      | Barcelona                  | [103]      |
| 1935 | November  | 10 – 11 | Genova                     | [55]       |
| 1936 | January   |         | Savona                     | [106]      |
| 1936 | October   | 12      | Sassari                    | [110]      |
| 1936 | September | 25 – 26 | Genova                     | [55]       |
| 1937 | January   |         | Savona                     | [106]      |
| 1938 | September | 9       | Genova                     | [55]       |
| 1939 | January   | 2       | La Spezia                  | [110]      |
| 1939 | May       | 16      | Livorno                    | [110]      |
| 1939 | August    | 31      | Cagliari (2)               | [104]      |
| 1940 | September | 22      | Sassari                    | [110]      |
| 1940 | October   | 30      | Sassari                    | [110]      |
| 1940 | November  | 17      | Alpes Marittimes           | [94]       |
| 1942 | April     | 28 – 29 | Barcelona                  | [103]      |
| 1943 | October   | 25      | Savona                     | [106]      |
| 1944 | February  | 24 – 26 | Barcelona                  | [103]      |
| 1944 | November  | 2       | Pisa, Grosseto             | [107]      |
| 1945 |           |         | Genova                     | [55]       |
| 1945 | August    | 8       | Savona                     | [106]      |
| 1945 | October   |         | Savona                     | [106]      |
| 1945 |           | 29      | Genova                     | [105]      |
| 1946 |           |         | Sassari, Livorno           | [55]       |
| 1946 | March     | 7       | Livorno                    | [110]      |
| 1946 | October   | 26 – 27 | Cagliari (35), Sassari (5) | [104]      |
| 1947 | August    | 29      | Sassari                    | [110]      |
| 1948 | February  | 27      | Barcelona                  | [103]      |
| 1948 | May       | 27 – 28 | Genova, Savona*            | [55,106*]  |
| 1948 | October   | 26 – 27 | Savona, La Spezia*         | [106,110*] |
| 1949 | September | 28      | Valencia                   | [103]      |
| 1949 | October   | 3       | Livorno                    | [110]      |
| 1949 |           | 27      | Massa-Carrara              | [110]      |
| 1949 | November  | 26      | Livorno                    | [110]      |

|      |           |         |                            |           |
|------|-----------|---------|----------------------------|-----------|
| 1949 |           | 27      | Sassari                    | [110]     |
| 1950 | April     | 15      | Massa-Carrara              | [110]     |
| 1949 | September | 18      | Imperia                    | [110]     |
| 1951 |           |         | Genova, Sassari            | [55]      |
| 1951 | January   | 3       | La Spezia                  | [110]     |
| 1951 | March     | 9       | Sassari                    | [110]     |
| 1951 |           | 10      | Livorno                    | [110]     |
| 1951 | July      | 17      | Livorno                    | [110]     |
| 1951 | September | 26      | Livorno                    | [110]     |
| 1951 | October   | 1 – 15  | Barcelona                  | [103]     |
| 1951 |           | 8 – 9   | Genova                     | [102]     |
| 1951 |           | 15 – 19 | Cagliari (5), Sassari      | [104]     |
| 1951 |           | 31      | Grosseto                   | [110]     |
| 1951 | November  | 2       | Grosseto                   | [110]     |
| 1951 |           | 10 – 12 | Massa-Carrara              | [110]     |
| 1951 |           | 25      | Grosseto                   | [110]     |
| 1952 |           |         | Livorno                    | [55]      |
| 1952 | April     | 24      | Alpes Marittimes           | [94]      |
| 1952 | July      | 23      | Sassari                    | [110]     |
| 1952 | August    | 19      | La Spezia                  | [110]     |
| 1952 | December  | 4       | Livorno                    | [110]     |
| 1953 | February  | 14      | Sassari                    | [110]     |
| 1953 | March     | 16      | Cagliari                   | [104]     |
| 1953 | June      | 11      | Sassari                    | [110]     |
| 1953 | September | 19      | Genova                     | [112]     |
| 1953 | October   | 14      | La Spezia                  | [110]     |
| 1953 |           | 15      | Genova (1)                 | [55]      |
| 1954 | July      | 11      | Sassari                    | [110]     |
| 1954 | October   | 25      | La Spezia                  | [110]     |
| 1954 | November  | 28      | Imperia                    | [110]     |
| 1954 | December  | 1       | La Spezia                  | [110]     |
| 1955 | September | 29      | Sassari                    | [110]     |
| 1955 | October   | 21      | Imperia                    | [110]     |
| 1955 | November  | 2       | Sassari                    | [110]     |
| 1955 |           | 10      | Massa-Carrara              | [110]     |
| 1955 |           | 17      | Sassari                    | [110]     |
| 1956 | March     | 24 – 25 | Alpes Marittimes           | [94]      |
| 1956 | April     | 30 – 1  | Grosseto                   | [110]     |
| 1957 | January   | 22      | Cagliari                   | [104]     |
| 1957 | June      | 8 – 14  | Alpes Marittimes           | [94]      |
| 1957 | October   | 14      | Valencia (81)              | [107]     |
| 1957 | November  | 5 – 7   | Savona                     | [106]     |
| 1957 | December  | 11 – 12 | Alpes Marittimes, Imperia* | [94,110*] |
| 1958 |           |         | Sassari                    | [55]      |
| 1958 | June      | 10      | Savona                     | [106]     |
| 1958 | November  | 27 – 29 | Sassari                    | [55]      |
| 1958 | December  | 21      | La Spezia                  | [110]     |
| 1959 | October   | 28      | La Spezia                  | [110]     |

|      |           |         |                                                                   |                  |
|------|-----------|---------|-------------------------------------------------------------------|------------------|
| 1959 | December  | 1 – 2   | Savona                                                            | [106]            |
| 1959 |           | 25      | Grosseto                                                          | [110]            |
| 1960 | August    | 12      | Massa-Carrara                                                     | [110]            |
| 1960 | September | 5 – 6   | Grosseto, Livorno                                                 | [110]            |
| 1960 | October   | 15      | La Spezia                                                         | [110]            |
| 1961 |           |         | Livorno                                                           | [55]             |
| 1961 | January   | 4       | La Spezia                                                         | [110]            |
| 1961 | September | 6       | Livorno                                                           | [110]            |
| 1961 | October   | 2       | Livorno                                                           | [110]            |
| 1961 | November  | 12      | Grosseto                                                          | [110]            |
| 1961 |           | 14      | Grosseto                                                          | [110]            |
| 1961 |           | 22 – 23 | Cagliari                                                          | [104]            |
| 1961 | December  | 27      | Grosseto                                                          | [110]            |
| 1961 |           | 29      | Grosseto                                                          | [110]            |
| 1962 | September | 25      | Barcelona (441) (815*)                                            | [113]            |
| 1961 | October   | 10 – 15 | Barcelona                                                         | [103]            |
| 1961 |           | 27 – 28 | Savona                                                            | [106]            |
| 1963 |           |         | Livorno                                                           | [55]             |
| 1963 | January   | 25      | Imperia                                                           | [110]            |
| 1963 | August    | 14      | Genova                                                            | [102]            |
| 1963 | September | 4       | Genova                                                            | [55]             |
| 1963 | December  | 5       | Livorno                                                           | [110]            |
| 1964 |           |         | Sassari                                                           | [55]             |
| 1964 | November  | 8 – 9   | Sassari                                                           | [55]             |
| 1965 |           |         | Livorno                                                           | [55]             |
| 1965 | March     | 17 – 18 | Savona                                                            | [106]            |
| 1965 | August    | 23 – 24 | Massa-Carrara                                                     | [110]            |
| 1965 | September |         | Imperia                                                           | [110]            |
| 1965 |           | 1 – 2   | Grosseto, Livorno                                                 | [110]            |
| 1965 |           | 29      | Massa-Carrara                                                     | [110]            |
| 1965 | October   | 1       | Imperia                                                           | [110]            |
| 1965 |           | 17 – 18 | Cagliari                                                          | [104]            |
| 1965 |           | 25      | Cagliari                                                          | [104]            |
| 1966 |           |         | Livorno                                                           | [55]             |
| 1966 | July      | 29      | Livorno                                                           | [110]            |
| 1966 | September | 29      | Alpes Marittimes                                                  | [94]             |
| 1966 | October   | 3       | La Spezia                                                         | [110]            |
| 1966 |           | 21      | La Spezia                                                         | [110]            |
| 1966 |           | 25 – 26 | Savona                                                            | [106]            |
| 1966 |           | 28      | Massa-Carrara                                                     | [110]            |
| 1966 | November  | 3 – 4   | Pisa (34), Grosseto (1)*, La Spezia**, Livorno**, Massa-Carrara** | [107*,110**,112] |
| 1966 |           | 16      | La Spezia                                                         | [110]            |
| 1966 |           | 23      | Grosseto                                                          | [110]            |
| 1966 | December  | 28      | Livorno                                                           | [110]            |
| 1967 | November  | 6       | La Spezia                                                         | [110]            |
| 1968 |           |         | Massa-Carrara                                                     | [110]            |
| 1968 | July      | 17      | Savona                                                            | [106]            |
| 1968 |           | 24      | Massa-Carrara                                                     | [110]            |

|      |           |         |                           |           |
|------|-----------|---------|---------------------------|-----------|
| 1968 | October   | 8 – 9   | La Spezia                 | [110]     |
| 1968 | November  | 2 – 3   | Genova (44)               | [112]     |
| 1968 |           | 17      | Massa-Carrara             | [110]     |
| 1970 | October   | 7 – 8   | Genova (44)               | [107]     |
| 1970 | November  | 19      | Savona                    | [106]     |
| 1971 |           |         | Livorno                   | [55]      |
| 1971 | January   | 12      | Massa-Carrara             | [110]     |
| 1971 | June      | 7       | Livorno                   | [110]     |
| 1971 | September | 12      | La Spezia                 | [110]     |
| 1971 | September | 20 – 23 | Barcelona                 | [113]     |
| 1971 | October   | 15      | Grosseto                  | [110]     |
| 1971 | December  | 4 – 6   | Barcelona                 | [103]     |
| 1972 |           |         | Sassari                   | [55]      |
| 1972 | September | 11      | La Spezia                 | [110]     |
| 1972 | December  | 30      | Sassari                   | [55]      |
| 1973 |           |         | Livorno                   | [55]      |
| 1973 | September | 26      | Livorno                   | [110]     |
| 1974 |           |         | Livorno                   | [55]      |
| 1974 | February  | 1       | Grosseto                  | [110]     |
| 1974 | March     | 3       | Grosseto                  | [110]     |
| 1974 | August    | 28      | Livorno                   | [110]     |
| 1974 | September | 23      | Corse du Sud              | [94]      |
| 1975 | January   | 19      | Imperia                   | [110]     |
| 1975 | June      | 10      | La Spezia                 | [110]     |
| 1975 | September | 5       | La Spezia                 | [110]     |
| 1975 | October   | 14      | Livorno                   | [110]     |
| 1975 | December  | 16      | La Spezia                 | [110]     |
| 1976 | August    | 31      | Livorno                   | [110]     |
| 1976 | October   | 4       | La Spezia                 | [110]     |
| 1976 |           | 13      | Imperia                   | [110]     |
| 1977 | January   | 1 – 2   | La Spezia                 | [110]     |
| 1977 |           | 6       | Livorno                   | [110]     |
| 1977 | February  | 21      | La Spezia                 | [110]     |
| 1977 | July      | 31      | Savona                    | [106]     |
| 1977 | October   | 7 – 8   | Genova                    | [112]     |
| 1977 | December  | 8       | Imperia                   | [110]     |
| 1979 |           |         | Sassari                   | [55]      |
| 1979 | February  | 21 – 22 | Sassari                   | [55]      |
| 1979 | September | 21      | Genova                    | [55]      |
| 1979 | October   | 5       | Imperia                   | [110]     |
| 1979 |           | 6       | Grosseto                  | [110]     |
| 1979 |           | 10 – 15 | Alpes Maritimes, Imperia* | [94,110*] |
| 1980 |           |         | Imperia                   | [110]     |
| 1980 | November  | 12      | Corse du Sud              | [94]      |
| 1981 | September | 10      | La Spezia                 | [110]     |
| 1981 |           | 25 – 26 | Alpes Maritimes, Imperia* | [94,110*] |
| 1981 | December  | 29 – 31 | Pisa                      | [110]     |
| 1982 | August    | 7       | La Spezia                 | [110]     |

|      |           |         |                                                                                                 |                 |
|------|-----------|---------|-------------------------------------------------------------------------------------------------|-----------------|
| 1982 |           | 28      | Imperia                                                                                         | [110]           |
| 1982 |           | 29      | Pisa                                                                                            | [110]           |
| 1982 | September | 22      | Genova                                                                                          | [110]           |
| 1982 |           | 25 – 26 | Savona, Massa-Carrara*                                                                          | [106,110*]      |
| 1982 | November  | 6 – 10  | Alpes Marittimes, Corse du Sud, Barcelona*, Grosseto**,<br>La Spezia**, Massa-Carrara**, Pisa** | [94,113*,110**] |
| 1982 |           | 14      | La Spezia, Massa-Carrara                                                                        | [110]           |
| 1983 |           |         | Sassari                                                                                         | [55]            |
| 1983 | August    | 24 – 26 | Livorno                                                                                         | [110]           |
| 1983 | November  | 3       | Grosseto                                                                                        | [110]           |
| 1983 |           | 6       | Valencia                                                                                        | [103]           |
| 1983 |           | 6 – 8   | Barcelona                                                                                       | [103]           |
| 1983 |           | 10      | Valencia                                                                                        | [103]           |
| 1983 |           | 7       | Sassari                                                                                         | [55]            |
| 1984 |           |         | Livorno                                                                                         | [55]            |
| 1984 | August    | 24      | La Spezia                                                                                       | [110]           |
| 1984 | September | 6       | Livorno                                                                                         | [110]           |
| 1984 |           | 12      | Grosseto                                                                                        | [110]           |
| 1984 |           | 19 – 23 | Grosseto                                                                                        | [110]           |
| 1984 | October   | 5       | Grosseto, Livorno                                                                               | [110]           |
| 1984 | November  | 19      | Grosseto                                                                                        | [110]           |
| 1984 |           | 28      | Livorno, Pisa                                                                                   | [110]           |
| 1985 | March     | 2       | Imperia                                                                                         | [110]           |
| 1985 | October   | 28 – 29 | Cagliari                                                                                        | [104]           |
| 1985 |           | 30      | Livorno                                                                                         | [110]           |
| 1986 | October   | 14 – 17 | Cagliari (11)                                                                                   | [104]           |
| 1987 | September | 28 – 5  | Barcelona                                                                                       | [103]           |
| 1987 |           | 2 – 5   | Barcelona                                                                                       | [113]           |
| 1987 | October   | 10      | Grosseto                                                                                        | [110]           |
| 1987 |           | 12      | Grosseto, Pisa                                                                                  | [110]           |
| 1987 |           | 21      | Pisa                                                                                            | [110]           |
| 1987 |           | 29 – 30 | Grosseto                                                                                        | [110]           |
| 1987 | November  | 3 – 11  | Valencia                                                                                        | [103]           |
| 1988 | October   | 1       | Cagliari                                                                                        | [104]           |
| 1989 |           |         | Sassari                                                                                         | [55]            |
| 1989 | April     | 18      | La Spezia                                                                                       | [110]           |
| 1989 | July      | 11      | Pisa                                                                                            | [110]           |
| 1989 | August    | 7       | Grosseto                                                                                        | [110]           |
| 1989 | September | 3 – 10  | Valencia                                                                                        | [103]           |
| 1989 | November  | 18      | Sassari                                                                                         | [55]            |
| 1990 |           |         | Livorno                                                                                         | [55]            |
| 1990 | September | 16      | Livorno                                                                                         | [110]           |
| 1990 | October   | 3       | Livorno                                                                                         | [110]           |
| 1990 |           | 9       | Cagliari                                                                                        | [104]           |
| 1990 | November  | 26      | Pisa                                                                                            | [110]           |
| 1990 | December  | 11      | Grosseto                                                                                        | [110]           |
| 1991 |           |         | Genova, Livorno, La Spezia*                                                                     | [55,110*]       |
| 1991 | May       | 3       | Grosseto                                                                                        | [110]           |

|      |           |         |                                |                |
|------|-----------|---------|--------------------------------|----------------|
| 1991 | September | 23      | Livorno, Pisa                  | [110]          |
| 1991 |           | 29      | Imperia                        | [110]          |
| 1991 |           | 30      | Pisa                           | [110]          |
| 1991 | October   | 4 – 5   | Valencia                       | [103]          |
| 1991 |           | 12      | Livorno, Massa-Carrara, Pisa   | [110]          |
| 1991 | November  | 16      | Pisa                           | [110]          |
| 1991 |           | 20      | Pisa                           | [110]          |
| 1992 |           |         | Genova, Sassari                | [55]           |
| 1992 | January   | 25 – 26 | Sassari                        | [55]           |
| 1992 | June      | 10      | Massa-Carrara                  | [110]          |
| 1992 | July      | 11      | Massa-Carrara                  | [110]          |
| 1992 | August    | 10      | Massa-Carrara                  | [110]          |
| 1992 | September | 10      | Savona                         | [106]          |
| 1992 |           | 22      | Savona (3)                     | [55,106]       |
| 1992 |           | 27      | Genova (2) (7, Savona*)        | [55,105*]      |
| 1992 | October   | 4 – 5   | Savona, Livorno*               | [106,110*]     |
| 1992 |           | 10      | Livorno, Pisa                  | [110]          |
| 1992 |           | 17      | La Spezia                      | [110]          |
| 1992 |           | 20      | Corse du Sud, Livorno*, Pisa*  | [94,110*]      |
| 1992 |           | 31      | Pisa                           | [110]          |
| 1992 | December  | 5       | Imperia, La Spezia             | [110]          |
| 1992 |           | 8       | Grosseto                       | [110]          |
| 1993 |           |         | Genova, Livorno                | [55]           |
| 1993 | September | 9       | Savona                         | [106]          |
| 1993 |           | 23      | Genova (5), Savona*            | [55,106*]      |
| 1993 |           | 12 – 13 | Alpes Maritimes                | [94]           |
| 1993 | October   | 1       | Massa-Carrara                  | [110]          |
| 1993 |           | 2       | La Spezia                      | [110]          |
| 1993 |           | 5 – 7   | Alpes Maritimes, Imperia*      | [94,110*]      |
| 1993 |           | 8 – 9   | Livorno, Pisa                  | [110]          |
| 1993 | October   | 31 – 1  | Corse du Sud (2)               | [115]          |
| 1993 | November  |         | Corse du Sud                   | [115]          |
| 1994 |           |         | Genova, Livorno*               | [55,110*]      |
| 1994 | February  | 5 – 6   | Savona, Imperia*               | [106,110*]     |
| 1994 | June      | 26      | Alpes Maritimes                | [94]           |
| 1994 | September | 8       | Savona                         | [106]          |
| 1994 | October   | 9 – 11  | Barcelona                      | [103]          |
| 1994 | November  | 1 – 6   | Alpes Maritimes, Imperia*      | [94,110*]      |
| 1994 |           | 7       | La Spezia, Massa-Carrara, Pisa | [110]          |
| 1995 |           |         | Sassari                        | [55]           |
| 1995 | June      | 19      | La Spezia                      | [110]          |
| 1995 | August    | 8       | Genova, Massa-Carrara*         | [55,110*]      |
| 1995 | September | 7       | Imperia                        | [110]          |
| 1995 |           | 18 – 22 | Barcelona, Imperia*            | [103,108,110*] |
| 1995 |           | 25      | Savona                         | [106]          |
| 1995 | October   |         | Genova                         | [105]          |
| 1995 |           | 5       | Grosseto, Livorno              | [110]          |
| 1995 | November  | 16      | Imperia, La Spezia             | [110]          |



|      |           |         |                                                                           |                |
|------|-----------|---------|---------------------------------------------------------------------------|----------------|
| 1995 | December  | 9 – 10  | Sassari                                                                   | [55]           |
| 1995 |           | 26      | Massa-Carrara                                                             | [110]          |
| 1995 |           | 31      | Grosseto                                                                  | [110]          |
| 1996 |           |         | Sassari                                                                   | [55]           |
| 1996 | January   | 9       | Grosseto                                                                  | [110]          |
| 1996 |           | 10 – 12 | Alpes Marittimes                                                          | [94]           |
| 1996 | February  | 19      | Livorno, Pisa                                                             | [110]          |
| 1996 | March     | 7 – 8   | Sassari                                                                   | [55]           |
| 1996 | April     | 2       | Massa-Carrara                                                             | [110]          |
| 1996 | June      | 19      | Massa-Carrara                                                             | [55,110]       |
| 1996 | August    | 11      | Massa-Carrara                                                             | [110]          |
| 1996 | September | 2 – 3   | Barcelona                                                                 | [103]          |
| 1996 |           | 8 – 12  | Valencia                                                                  | [103]          |
| 1996 |           | 21 – 22 | Corse du Sud                                                              | [94]           |
| 1996 |           | 23      | Massa-Carrara                                                             | [110]          |
| 1996 | October   | 6 – 7   | Sassari                                                                   | [55]           |
| 1996 |           | 13 – 15 | Barcelona                                                                 | [103]          |
| 1996 |           | 16      | Grosseto                                                                  | [110]          |
| 1996 |           | 16 – 18 | Barcelona                                                                 | [103]          |
| 1996 | November  | 16      | Livorno, Massa-Carrara, Pisa                                              | [110]          |
| 1997 | June      |         | Grosseto                                                                  | [110]          |
| 1997 |           | 27      | Massa-Carrara                                                             | [110]          |
| 1997 | August    | 6       | Grosseto                                                                  | [110]          |
| 1997 |           | 26      | Grosseto                                                                  | [110]          |
| 1997 | September | 29 – 1  | Valencia                                                                  | [103]          |
| 1997 | October   |         | Grosseto                                                                  | [110]          |
| 1997 |           | 6 – 7   | Genova                                                                    | [55]           |
| 1997 | November  |         | Imperia, La Spezia                                                        | [110]          |
| 1997 |           | 7 – 9   | Genova, Massa-Carrara*                                                    | [55,110*]      |
| 1998 |           |         | La Spezia                                                                 | [110]          |
| 1998 | February  | 4       | Grosseto                                                                  | [110]          |
| 1998 | September |         | Imperia, La Spezia                                                        | [110]          |
| 1998 | October   |         | Imperia, La Spezia, Massa-Carrara                                         | [110]          |
| 1998 | November  | 4       | Pisa                                                                      | [110]          |
| 1998 | December  | 3       | Barcelona                                                                 | [103]          |
| 1999 | September | 14 – 15 | Barcelona                                                                 | [103]          |
| 1999 | October   | 23 – 24 | Genova, Imperia*                                                          | [110*]         |
| 1999 | November  |         | La Spezia, Pisa                                                           | [110]          |
| 1999 |           | 11 – 13 | Cagliari (2)                                                              | [55]           |
| 1999 |           | 23      | Grosseto                                                                  | [110]          |
| 2000 | June      | 9 – 11  | Barcelona (5)                                                             | [103,113]      |
| 2000 | October   | 10 – 15 | Alpes Marittimes                                                          | [94]           |
| 2000 |           | 13 – 16 | Imperia, Savona, Genova, La Spezia                                        | [112]          |
| 2000 |           | 20 – 25 | Valencia                                                                  | [103]          |
| 2000 |           | 30      | Imperia                                                                   | [110]          |
| 2000 | November  | 5 – 6   | Imperia, Savona, Genova, Alpes Marittimes*, Livorno**,<br>Massa-Carrara** | [55,94*,110**] |
| 2000 |           | 23      | Imperia (2), Savona (2)                                                   | [107]          |
| 2001 | January   | 6       | Grosseto                                                                  | [110]          |
| 2001 | November  | 11 – 17 | Barcelona                                                                 | [103]          |

|      |           |          |                                        |           |
|------|-----------|----------|----------------------------------------|-----------|
| 2002 | July      | 31       | Barcelona                              | [108]     |
| 2002 | August    | 2        | Barcelona                              | [114]     |
| 2002 |           | 25       | Alpes Maritimes                        | [94]      |
| 2002 | September | 12 – 23  | Barcelona                              | [103]     |
| 2002 | October   | 8 – 10   | Barcelona                              | [103]     |
| 2002 |           | 9        | Cagliari                               | [55]      |
| 2002 | November  | 11       | Cagliari                               | [55]      |
| 2002 |           | 23 – 26  | Imperia, Genova (1), Alpes Maritimes * | [55,94*]  |
| 2003 | February  | 26 – 27  | Barcelona                              | [103]     |
| 2003 | August    | 16 – 20  | Barcelona                              | [103]     |
| 2003 | September | 23       | Massa-Carrara (2)                      | [55]      |
| 2003 |           | 27       | Barcelona                              | [103]     |
| 2003 | October   | 31       | Alpes Maritimes                        | [94]      |
| 2004 |           |          | Livorno                                | [55]      |
| 2004 | June      | 14       | Valencia                               | [114]     |
| 2004 | August    | 3 – 5    | Alpes Maritimes, Corse du Sud          | [94]      |
| 2004 | September | 1 – 7    | Valencia                               | [103]     |
| 2004 |           | 14       | Corse du Sud                           | [94]      |
| 2005 | April     | 5 – 6    | Cagliari                               | [55]      |
| 2005 | August    | 2        | Barcelona                              | [108]     |
| 2005 |           | 20       | Barcelona                              | [108]     |
| 2005 | September | 5 – 9    | Corse du Sud, Barcelona*               | [94,103*] |
| 2005 | October   | 11 – 15  | Barcelona                              | [103]     |
| 2005 | November  | 13       | Cagliari                               | [55]      |
| 2005 | December  | 2        | Alpes Maritimes                        | [94]      |
| 2006 | January   | 26 – 29  | Alpes Maritimes                        | [94]      |
| 2006 | August    | 16 – 17  | Genova                                 | [55]      |
| 2006 | September | 13 – 14  | Corse du Sud, Barcelona (1)*           | [94,114*] |
| 2006 |           | 15       | Imperia                                | [55]      |
| 2006 |           | 25 – 26  | Cagliari                               | [55]      |
| 2006 | November  | 7 – 10   | Valencia                               | [103]     |
| 2006 |           | 13       | Cagliari                               | [55]      |
| 2007 | June      | 10 -14   | Genova                                 | [55]      |
| 2007 | October   | 11 – 19  | Valencia                               | [103]     |
| 2007 |           | 25 – 30  | Corse du Sud                           | [94]      |
| 2007 | December  | 22 – 23  | Corse du Sud                           | [115]     |
| 2008 |           |          | Sassari                                | [55]      |
| 2008 | January   | 11       | Alpes Maritimes                        | [94]      |
| 2008 | May       | 29 – 30  | Corse du Sud                           | [115]     |
| 2008 | June      | 16       | Genova                                 | [55]      |
| 2008 | October   | 8 – 19   | Valencia                               | [103]     |
| 2008 |           | 10       | Valencia (2)                           | [114]     |
| 2008 |           | 22 – 23  | Cagliari (4), Corse du Sud *           | [55,94*]  |
| 2008 | November  | 4        | Sassari                                | [55]      |
| 2008 |           | 27 – 29  | Corse du Sud                           | [94]      |
| 2009 |           |          | Livorno                                | [55]      |
| 2009 | September | 15 – 19  | Alpes Maritimes                        | [94]      |
| 2009 | December  | (Winter) | Pisa                                   | [116]     |
| 2010 |           |          | Genova, Sassari                        | [55]      |

|      |           |         |                                             |            |
|------|-----------|---------|---------------------------------------------|------------|
| 2010 | January   | 25 – 26 | Sassari                                     | [55]       |
| 2010 | June      | 14-16   | Alpes Marittimes                            | [94]       |
| 2010 | September | 7       | Genova                                      | [55]       |
| 2010 |           | 17 – 18 | Barcelona                                   | [103]      |
| 2010 | October   | 4       | Genova (1), Savona                          | [55]       |
| 2010 |           | 9 – 13  | Barcelona                                   | [103]      |
| 2010 |           | 31      | Alpes Marittimes                            | [94]       |
| 2011 | March     | 12 – 15 | Corse du Sud, Barcelona *                   | [94,114*]  |
| 2011 | October   | 24 – 25 | La Spezia (11), Cagliari, Massa-Carrara (2) | [55]       |
| 2011 | November  | 1 – 9   | Alpes Marittimes, Corse du Sud, Barcelona * | [94,114*]  |
| 2011 |           | 4       | Genova (6)                                  | [55]       |
| 2011 |           | 7       | Livorno (1)                                 | [55]       |
| 2011 |           | 22      | Valencia                                    | [114]      |
| 2012 | May       | 20 – 21 | Corse du Sud                                | [94]       |
| 2012 | September | 1 – 5   | Corse du Sud                                | [115]      |
| 2012 | October   | 26      | Alpes Marittimes                            | [94]       |
| 2012 | November  | 10 – 11 | Massa-Carrara (1)                           | [105]      |
| 2012 |           | 12      | Grosseto (7)                                | [55]       |
| 2012 |           | 28 – 29 | Massa-Carrara, La Spezia                    | [55]       |
| 2012 | December  | 4       | Pisa (1)                                    | [105]      |
| 2013 |           |         | Sassari                                     | [55]       |
| 2013 | March     | 5 – 6   | Corse du Sud                                | [94]       |
| 2013 | July      | 29      | Alpes Marittimes                            | [94]       |
| 2013 | October   | 5       | Grosseto (2)                                | [105]      |
| 2013 |           | 24      | Pisa                                        | [116]      |
| 2013 | November  | 18      | Sassari (16)                                | [105]      |
| 2013 | December  | 25 – 26 | Alpes Marittimes, Corse du Sud              | [94]       |
| 2013 |           | 28      | Valencia                                    | [114]      |
| 2014 |           |         | Genova                                      | [55]       |
| 2014 | January   | 18      | Alpes Marittimes                            | [94]       |
| 2014 |           | 19      | Genova (1)                                  | [105]      |
| 2014 |           | 31      | Pisa                                        | [116]      |
| 2014 | June      | 24      | Alpes Marittimes                            | [94]       |
| 2014 | July      | 28      | Barcelona                                   | [114]      |
| 2014 | October   |         | Pisa                                        | [116]      |
| 2014 |           | 9 – 11  | Genova (9*)                                 | [55, 107*] |
| 2014 |           | 15      | Grosseto (2)                                | [105]      |
| 2014 | November  |         | Pisa                                        | [116]      |
| 2014 |           | 3 – 4   | Alpes Marittimes                            | [94]       |
| 2014 |           | 5       | Massa-Carrara (1)                           | [55]       |
| 2014 |           | 10      | Genova (2)                                  | [55]       |
| 2014 |           | 15      | Genova (1), Savona*, Imperia*               | [105,107*] |
| 2015 |           |         | Sassari                                     | [55]       |
| 2015 | June      | 5 – 15  | Alpes Marittimes, Corse du Sud, Valencia*   | [94,114*]  |
| 2015 | July      | 22 – 23 | Cagliari                                    | [55]       |
| 2015 | August    | 24      | Pisa                                        | [116]      |
| 2015 | September | 12      | Alpes Marittimes                            | [94]       |
| 2015 | October   | 1 – 2   | Corse du Sud                                | [115]      |
| 2015 |           | 3 – 4   | Alpes Marittimes (20)                       | [117]      |

|      |           |         |                                                       |                 |
|------|-----------|---------|-------------------------------------------------------|-----------------|
| 2016 | April     | 23 – 24 | Pisa                                                  | [116]           |
| 2016 | June      | 7       | Alpes Marittimes                                      | [94]            |
| 2016 | September | 14      | Alpes Marittimes                                      | [94]            |
| 2016 |           | 16      | Corse du Sud                                          | [94]            |
| 2016 | October   | 12 – 14 | Alpes Marittimes                                      | [94]            |
| 2016 | November  | 22 – 24 | Imperia, Alpes Marittimes*, Corse du Sud*, Valencia** | [94*,105,114**] |
| 2016 | December  | 17      | Valencia                                              | [114]           |
| 2016 |           | 19 – 20 | Corse du Sud                                          | [115]           |
| 2016 |           | 19 – 20 | Corse du Sud                                          | [55]            |
| 2017 |           |         | Livorno                                               | [55]            |
| 2017 | January   | 21 – 23 | Corse du Sud                                          | [115]           |
| 2017 | February  | 8 – 9   | Corse du Sud                                          | [94]            |
| 2017 | September | 9 – 10  | Livorno (8)                                           | [55]            |
| 2017 | December  | 10 – 11 | Alpes Marittimes                                      | [94]            |
| 2018 | June      | 3       | Valencia                                              | [114]           |
| 2018 | August    | 2       | corse du Sud (5)                                      | [118]           |
| 2018 |           | 14      | Savona                                                | [106]           |
| 2018 | October   | 8 – 10  | Alpes Marittimes*, Cagliari (1), Barcelona**          | [94*,105,114**] |
| 2018 |           | 19      | Valencia                                              | [114]           |
| 2018 | November  | 14      | Barcelona                                             | [119]           |
| 2019 |           |         | Corse du Sud                                          | [55]            |
| 2019 | April     | 23      | Savona (2)                                            | [105]           |
| 2019 | September | 12      | Valencia                                              | [114]           |
| 2019 | October   | 15      | Alpes Marittimes                                      | [94]            |
| 2019 |           | 20 – 23 | Alpes Marittimes                                      | [94]            |
| 2019 |           | 21 – 22 | Genova (2)                                            | [107]           |
| 2019 | November  | 2 – 3   | Alpes Marittimes, Corse du Sud                        | [94]            |
| 2019 |           | 23 – 24 | Alpes Marittimes, Genova*, Savona*                    | [107*,117]      |
| 2019 | December  | 1       | Alpes Marittimes                                      | [94]            |
| 2019 |           | 20 – 22 | Corse du Sud                                          | [115]           |
| 2019 |           | 20 – 22 | Corse du Sud                                          | [55]            |
| 2020 | January   | 19 – 24 | Barcelona, Valencia*                                  | [114*,119]      |
| 2020 | April     | 21      | Barcelona                                             | [119]           |
| 2020 | May       | 9 – 11  | Alpes Marittimes                                      | [94]            |
| 2020 | June      | 3 – 4   | Alpes Marittimes                                      | [94]            |
| 2020 |           | 11      | Corse du Sud                                          | [115]           |
| 2020 | August    | 29      | Alpes Marittimes                                      | [94]            |
| 2020 | September | 11      | Corse du Sud                                          | [94]            |
| 2020 | October   | 2 – 3   | Imperia (10), Alpes Marittimes (10)                   | [105, 120]      |
| 2021 | October   | 4       | Genova                                                | [74]            |
| 2022 | May       | 4       | Valencia                                              | [118]           |
